# Supplementary material
Source: Springer Nature journal article supplement (https://www.springermedizin.de/resource/supplementary/12981_2006_55_MOESM2_ESM.pdf/9603726)

# AIDS or death

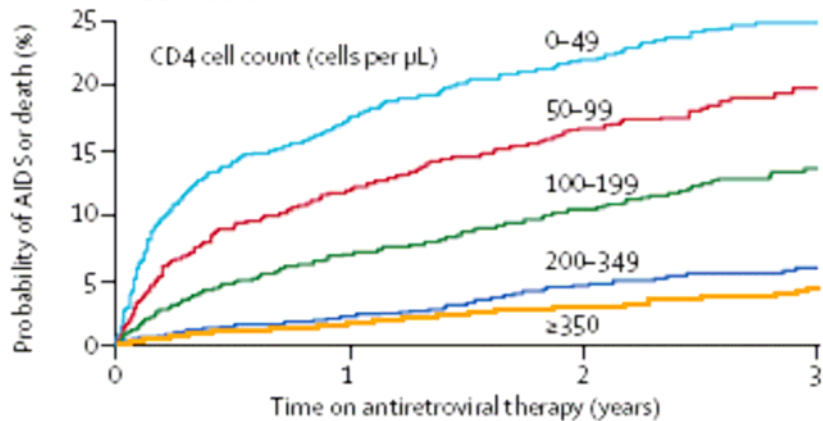

Supplement: MOESM2 [file 9603726]
